# Supplementary material for: One-pot synthesis of a highly porous anionic hypercrosslinked polymer for ultrafast adsorption of organic pollutants
Source: Royal Society of Chemistry journal article supplement (doi:10.1039/c8py01018h), 2018-01-01
Supplement: c8py01018h1.pdf [file c8py01018h1.pdf]

*Supporting Information for*

**One-pot synthesis of highly porous anionic hypercrosslinked polymer for ultrafast adsorption of organic pollutants**

Rui Shen,<sup>a</sup> Xiaodong Yan,<sup>a</sup> Ying-Jun Guan,<sup>a</sup> Wei Zhu,<sup>a</sup> Tao Li,<sup>a</sup> Xun-Gao Liu,<sup>c</sup>  
Yunxing Li,<sup>a</sup> and Zhi-Guo Gu<sup>\*a,b</sup>

<sup>a</sup> Key Laboratory of Synthetic and Biological Colloids, Ministry of Education, School of Chemical and Material Engineering, Jiangnan University, Wuxi 214122, China. Tel: +86-510-85917090, Fax: +86-510-85917763, E-mail: zhiguogu@jiangnan.edu.cn

<sup>b</sup> International Joint Research Center for Photoresponsive Molecules and Materials, School of Chemical and Material Engineering, Jiangnan University, Wuxi 214122, China.

<sup>c</sup> College of Material, Chemistry and Chemical Engineering, Hangzhou Normal University, Hangzhou 310036, China

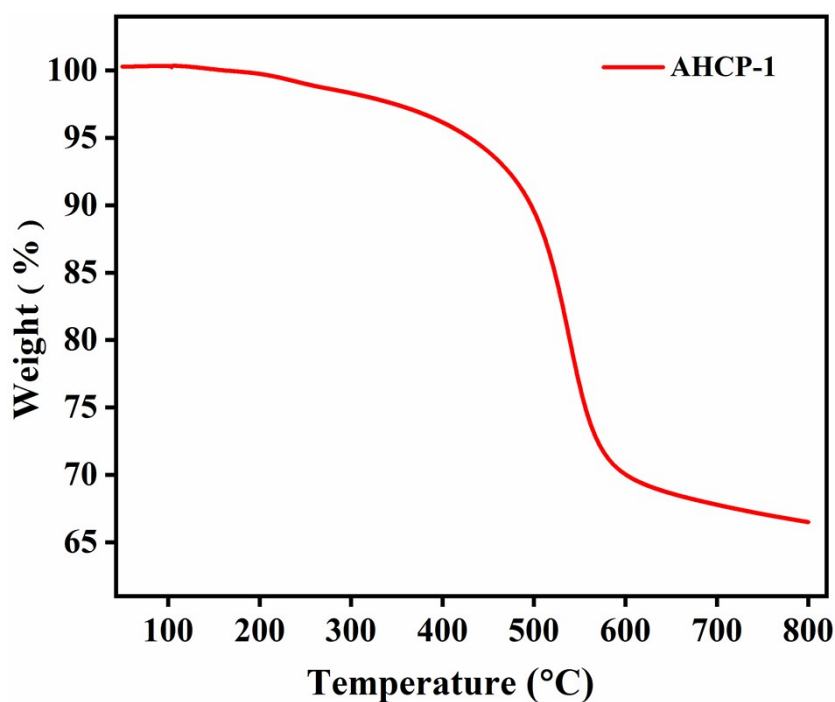

**Fig. S1** TG curve of AHCP-1 under N<sub>2</sub> atmosphere.

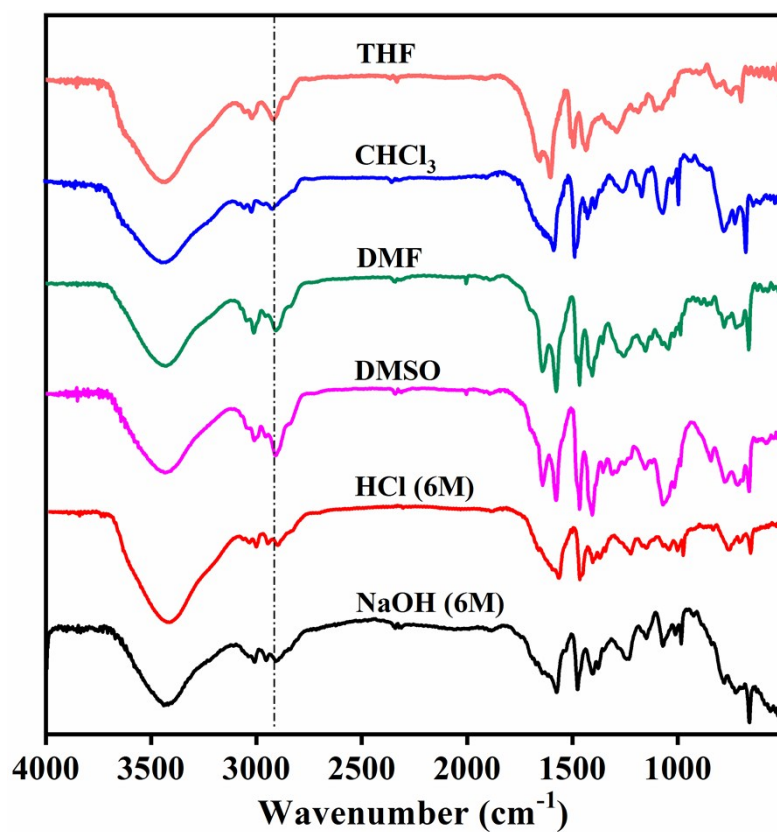

Fig. S2 FT-IR of AHCP-1 after treatment for one week in different solvents.

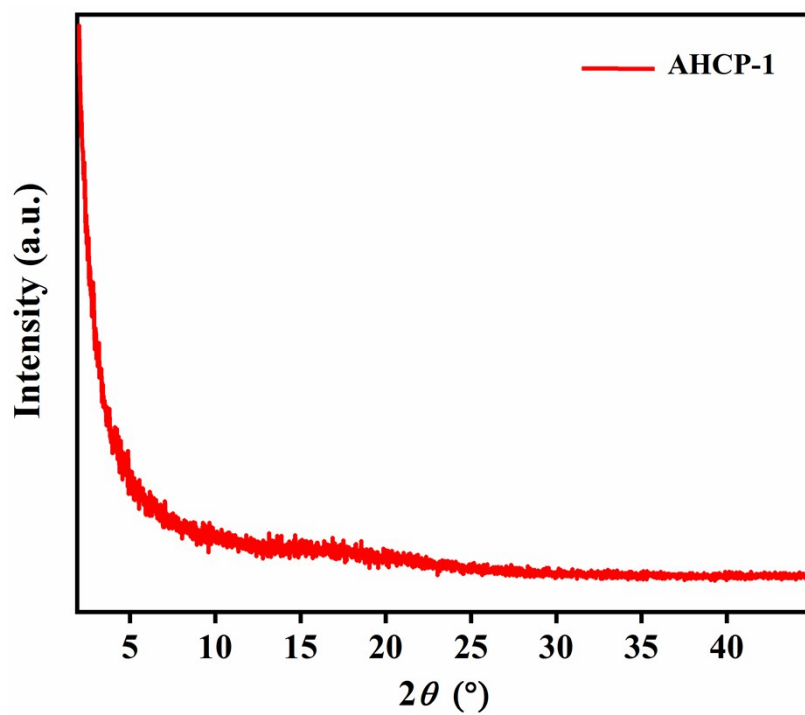

Fig. S3 The PXRD pattern of AHCP-1 at wide angle showing broad diffraction for thick amorphous pore wall.

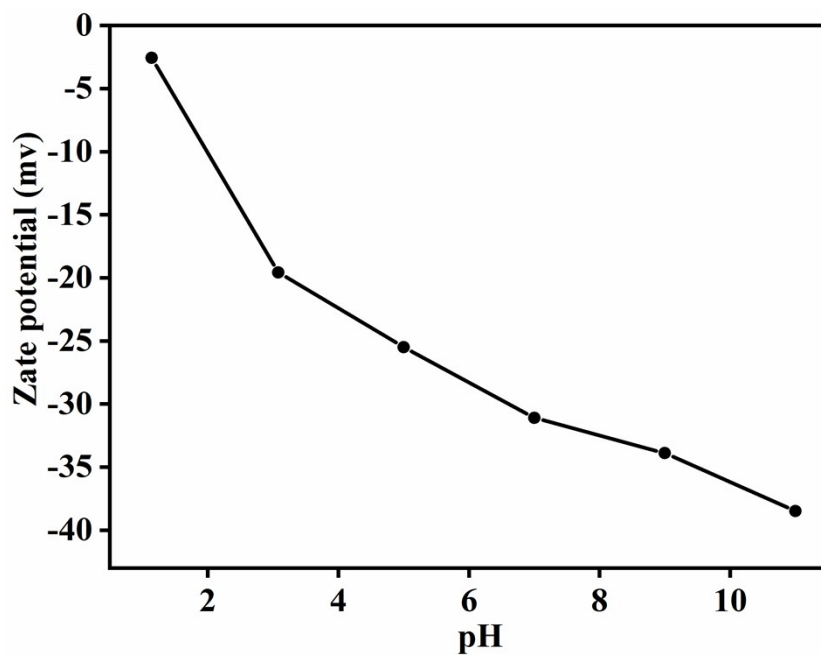

Fig. S4 Zeta potential vs. pH value of AHCP-1.

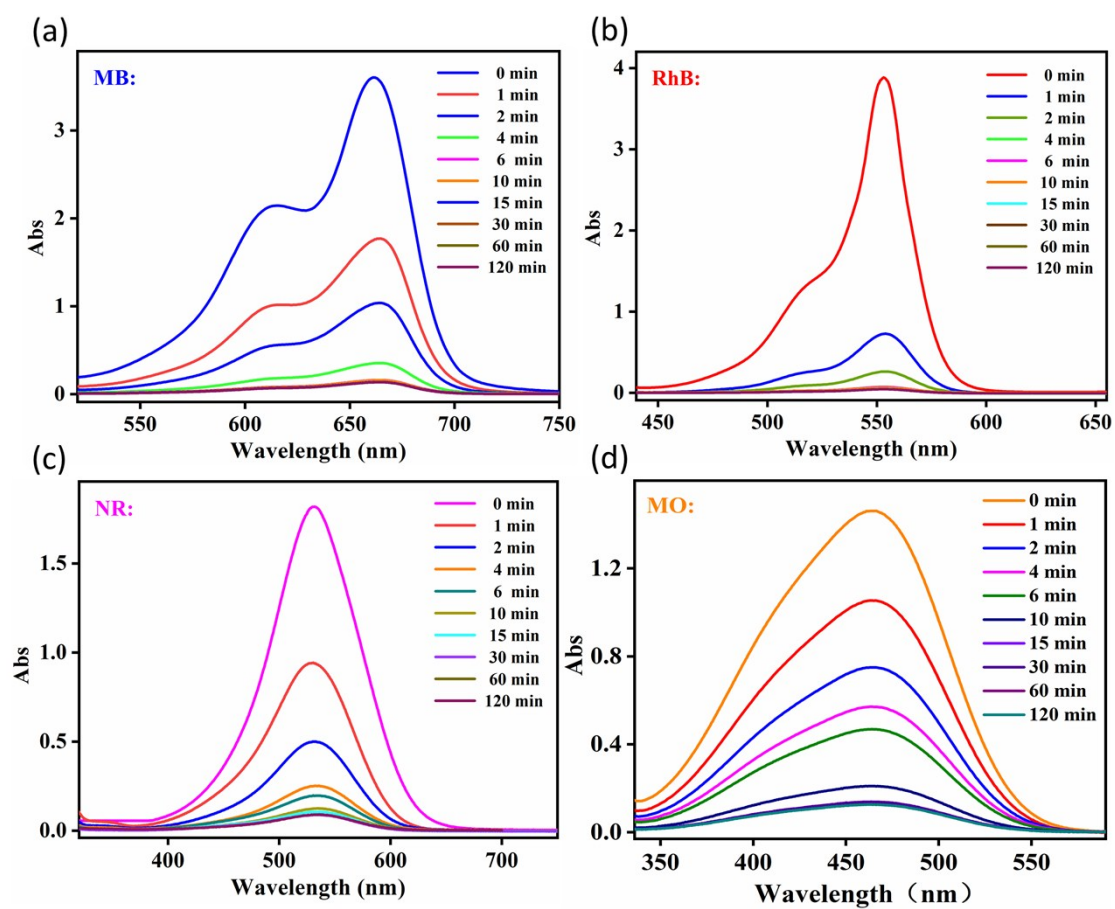

Fig. S5 Time-dependant electronic absorption spectral change (from 0 to 120 minutes) of the dyes at initial concentration of  $20 \text{ mg} \cdot \text{L}^{-1}$ . (a) MB, (b) RhB, (c) NR, (d) MO.

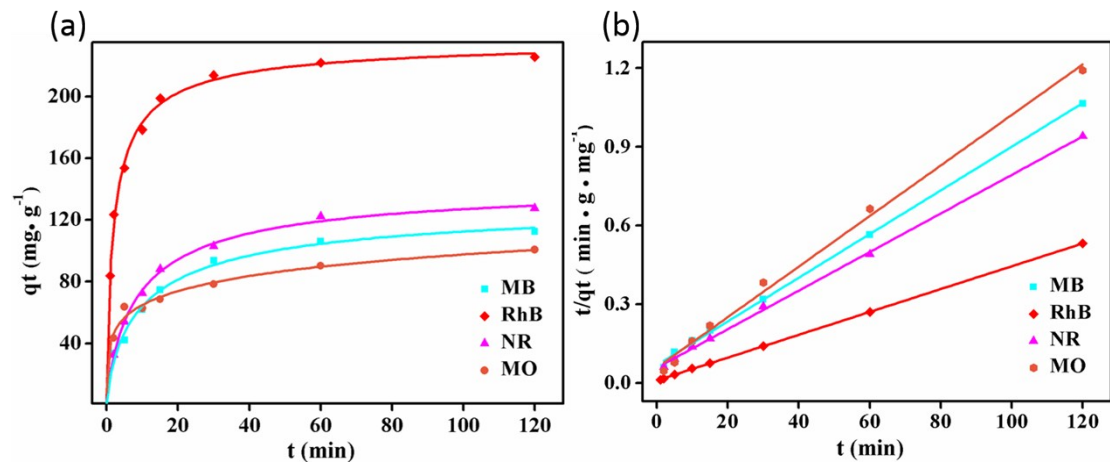

**Fig. S6** (a) Effect of contact time on the dyes adsorption at initial concentration of  $200 \text{ mg L}^{-1}$ . (b) Pseudo-second-order kinetics of dyes adsorption.

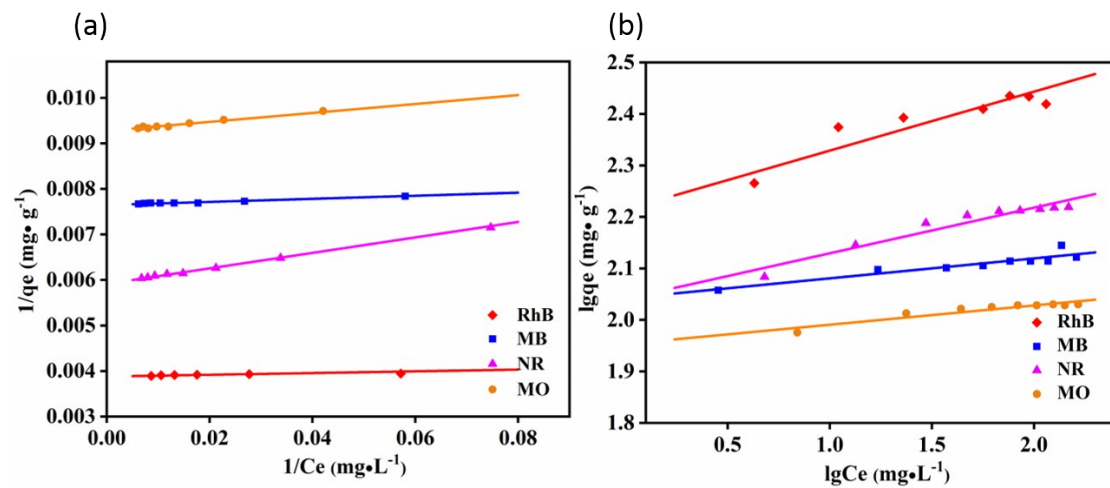

**Fig. S7** Linear regression using Langmuir isotherm model (a) and Freundlich isotherm model (b) for RhB, MB, NR, and MO on AHCP-1.

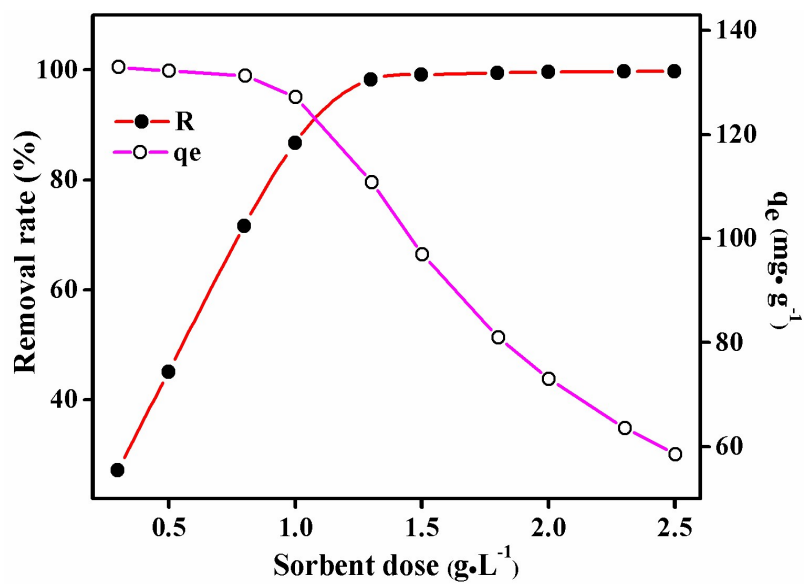

Fig. S8 The effect of AHCP-1 dose on the adsorption of MB.

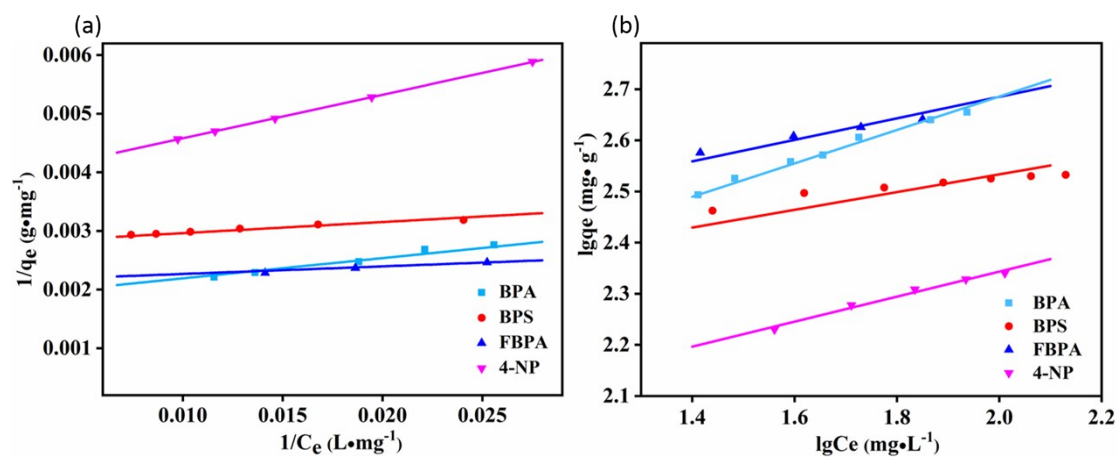

Fig. S9 Linear regression using Langmuir isotherm model (a) and Freundlich isotherm model (b) for BPA, BPS, FBPA, and 4-NP on AHCP-1.

**Table S1.** Additional six building blocks and yields of hypercrosslinking reactions.

| No. | Chemical names                                         | Building units                                                                       | Yield |
|-----|--------------------------------------------------------|--------------------------------------------------------------------------------------|-------|
| 1   | Sodium tetrakis(4-fluorophenyl)borate                  | 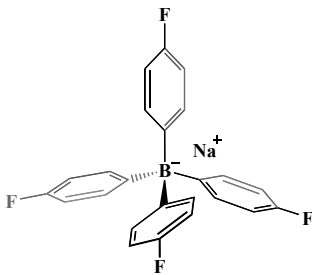   | 33.5% |
| 2   | Sodium tetrakis[3,5-bis(trifluoromethyl)phenyl] borate |    | 0.4%  |
| 3   | Tetraphenylphosphonium tetraphenylborate               |   | 74%   |
| 4   | Sodium tris(1-pyrazolyl)borohydride                    |  | 0%    |

**Table S2.** Average weight change before and after soaking in solvent for one week.

| Solvents           | Original weight | Soaked weight | Weight retention rate |
|--------------------|-----------------|---------------|-----------------------|
|                    | (mg)            | (mg)          |                       |
| THF                | 20.3            | 19.6          | 96.6%                 |
| CHCl <sub>3</sub>  | 20.1            | 20.0          | 98.0%                 |
| DMF                | 20.7            | 20.0          | 96.6%                 |
| DMSO               | 19.8            | 18.9          | 95.4%                 |
| aqueous HCl (6 M)  | 19.5            | 19.1          | 97.9%                 |
| aqueous NaOH (6 M) | 20.2            | 19.8          | 98.0%                 |

**Table S3.** Isotherm Parameters for the Adsorption of dyes onto **AHCP-1**

|     | Langmuir isotherm         |                                  |       | Freundlich isotherm         |       |       |
|-----|---------------------------|----------------------------------|-------|-----------------------------|-------|-------|
|     | $b$ (L·mg <sup>-1</sup> ) | $q_{\max}$ (mg·g <sup>-1</sup> ) | $R^2$ | $K_f$ (L·mg <sup>-1</sup> ) | $n$   | $R^2$ |
| MB  | 2.263                     | 130.7                            | 0.996 | 112.5                       | 30.99 | 0.838 |
| RhB | 1.879                     | 258.4                            | 0.997 | 158.4                       | 9.081 | 0.916 |
| NR  | 0.348                     | 169.2                            | 0.975 | 96.36                       | 54.17 | 0.918 |
| MO  | 0.944                     | 107.9                            | 0.981 | 88.81                       | 25.08 | 0.865 |

**Table S4.** Summary of the maximum adsorption capacity ( $q_{\max}$ ) of Rhodamine B (RhB) on various adsorbents.

| Adsorbent                                                              | $q_{\max}/\text{mg g}^{-1}$ | References       |
|------------------------------------------------------------------------|-----------------------------|------------------|
| C_carnauba_CaCl <sub>2</sub>                                           | 39.218                      | S1               |
| Char AC                                                                | 189.8                       | S2               |
| MoS <sub>2</sub>                                                       | 49.2                        | S3               |
| MWCNT-COOH                                                             | 42.68                       | S4               |
| Carboxy-GO/zeolite                                                     | 34.13                       | S5               |
| FGNC                                                                   | 33.2                        | S6               |
| Cd <sub>6</sub> (L) <sub>2</sub> (bib) <sub>2</sub> (DMA) <sub>4</sub> | 67                          | S7               |
| <b>AHCP-1</b>                                                          | <b>255</b>                  | <b>This work</b> |

**Table S5.** Isotherm Parameters for the Adsorption of Phenolic derivatives micropollutants onto **AHCP-1**.

|      | Langmuir isotherm           |                                    |       | Freundlich isotherm           |       |       |
|------|-----------------------------|------------------------------------|-------|-------------------------------|-------|-------|
|      | $b$ (L · mg <sup>-1</sup> ) | $q_{\max}$ (mg · g <sup>-1</sup> ) | $R^2$ | $K_f$ (L · mg <sup>-1</sup> ) | $n$   | $R^2$ |
| BPA  | 0.054                       | 540.5                              | 0.992 | 0.310                         | 3.059 | 0.986 |
| BPS  | 0.146                       | 361.1                              | 0.994 | 0.339                         | 5.767 | 0.877 |
| FBPA | 0.165                       | 467.2                              | 0.993 | 0.354                         | 4.751 | 0.987 |
| 4-NP | 0.052                       | 260.4                              | 0.998 | 0.268                         | 4.088 | 0.980 |

**Table S6.** Summary of the maximum adsorption capacity ( $q_{\max}$ ) of Bisphenol A (BPA) on various adsorbents.

| Adsorbent     | $q_{\max}/\text{mg g}^{-1}$ | References       |
|---------------|-----------------------------|------------------|
| P-CDP         | 88                          | S8               |
| magnetic rGOs | 48.74                       | S9               |
| GQ-02         | 313.5                       | S10              |
| W20N          | 432.34                      | S11              |
| graphene      | 181.82                      | S12              |
| EPI-CDP       | 84                          | S13              |
| PP-g-GMA-OA   | 45.59                       | S14              |
| <b>AHCP-1</b> | <b>540.5</b>                | <b>This work</b> |

**Table S7.** Structural parameters for the eight organic pollutants.

| Organic Pollutants           | Space-filling model                                                                 | Chemical class        | Molar mass<br>(g·mol <sup>-1</sup> ) | Molecular 3-D size (Å) |
|------------------------------|-------------------------------------------------------------------------------------|-----------------------|--------------------------------------|------------------------|
| Methylene blue (MB)          | 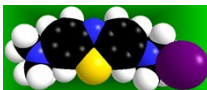   | Cationic dye          | 319.8                                | 17.043×8.243×6.815     |
| Rhodamine B (RhB)            |    | Cationic dye          | 479.01                               | 18.089×14.296×8.265    |
| Neutral red (NR)             |    | Neutral dye           | 288.77                               | 14.628×7.966×4.640     |
| Methyl orange (MO)           |    | Anionic dye           | 327.33                               | 19.803×7.084×6.346     |
| Bisphenol A (BPA)            |   | Bisphenol A analogues | 228.29                               | 12.215×7.701×6.697     |
| Bisphenol S (BPS)            |  | Bisphenol A analogues | 250.27                               | 10.813×7.907×6.501     |
| Hexafluorobisphenol A (FBPA) |  | Bisphenol A analogues | 336.23                               | 12.393×8.494×7.445     |
| 4-Nitrophenol (4-NP)         |  | Phenolics             | 139.11                               | 9.026×6.537×3.335      |



## References

- S1 V. da Silva Lacerda, J. B. López-Sotelo, A. Correa-Guimarães, S. Hernández-Navarro, M. Sánchez-Báscones, L. M. NavasGracia, P. Martín-Ramos and J. Martín-Gil, *J. Environ. Manage.*, 2015, **155**, 67–76.
- S2 T. Maneerung, J. Liew, Y. Dai, S. Kawi, C. Chong and C. H. Wang, *Bioresour. Technol.*, 2016, **200**, 350–359.
- S3 X. Wang, J. Ding, S. Yao, X. Wu, Q. Feng, Z. Wang and B. Geng, *J. Mater. Chem. A.*, 2014, **2**, 15958.
- S4 O. A. Oyetade, V. O. Nyamori, B. S. Martincigh and S. B. Jonnalagadda, *RSC Adv.*, 2015, **5**, 22724–22739.
- S5 Y. Yu, B. N. Murthy, J. G. Shapter, K. T. Constantopoulos, N. H. Voelcker and A. V. Ellis, *J. Hazard. Mater.*, 2013, **260**, 330–338.
- S6 J. Ding, B. Li, Y. Liu, X. Yan, S. Zeng, X. Zhang and J. Zhang, *J. Mater. Chem. A.*, 2015, **3**, 832–839.
- S7 F. Y. Yi, J. P. Li, D. Wu and Z. M. Sun, *Chem.–Eur. J.*, 2015, **21**, 11475–11482.
- S8 A. Alsbaiee, B. J. Smith, L. Xiao, Y. Ling, D. E. Helbling and W. R. Dichtel, *Nature.*, 2015, **529**, 190.
- S9 Z. X. Jin, X. X. Wang, Y. B. Sun, Y. J. Ai and X. K. Wang, *Environ. Sci. Technol.*, 2015, **49**, 9168–9175.
- S10 G. Q. Xiao, L. C. Fu and A. M. Li, *Chem. Eng. J.*, 2012, **191**, 171–176.
- S11 G. Liu, J. Ma, X. Li and Q. Qin, *J. Hazard. Mater.*, 2009, **164**, 1275–1280.
- S12 J. Xu, L. Wang and Y. F. Zhu, *Langmuir*, 2012, **28**, 8418–8425.
- S13 N. Morin-Crini and G. Crini, *Prog. Polym. Sci.*, 2013, **38**, 344–368.
- S14 X. Y. Zhou, J. F. Wei, K. Liu, N. N. Liu and B. Zhou, *Langmuir.*, 2014, **30**, 13861–13868.
